# Supplementary material for: Introducing oxygen vacancies in a bi-metal oxide nanosphere for promoting electrocatalytic nitrogen reduction
Source: Royal Society of Chemistry journal article supplement (doi:10.1039/d2nr06195c), 2023-01-01
Supplement: d2nr06195c1.pdf [file d2nr06195c1.pdf]

## **Introducing oxygen vacancies in bi-metal oxide nanosphere for promoting electrocatalytic nitrogen reduction**

Heen Li <sup>a</sup>, Xiaoyue Xu <sup>a</sup>, Xiaohu Lin <sup>b</sup>, Jianmin Chen <sup>a</sup>, Kunling Zhu <sup>a</sup>, Fei Peng <sup>b</sup>,  
Faming Gao\* <sup>a</sup>

a. Key Laboratory of Applied Chemistry, Yanshan University, Qinhuangdao 066004,  
P. R. China

b. Analyses and Testing Center, Hebei Normal University of Science and Technology,  
Qinhuangdao 066000, P. R. China

Corresponding Author

\*Faming Gao: E-mail: fmgao@ysu.edu.cn

## **Supporting information**

### **Characterizations.**

The microtopography of the prepared samples was characterized by transmission electron microscopy (TEM, JEOL 2100 plus + ARM 200 F). Energy dispersive X-ray spectroscopy attached to the transmission electron microscope was used to obtain elemental composition. Raman spectroscopy (WITec, alpha300R, excited by a 512 nm laser) was also performed. The crystalline phases were performed by X-ray diffraction (XRD) using an Rigaku D/MAX-2500 powder diffractometer. The chemical states of the prepared sample were conducted using a Thermo Scientific ESCALAB 250Xi photoelectron spectrometer. The absorbance data of spectrophotometer were collected on a SHIMADZU UV-2550 ultraviolet-visible (UV-vis) spectrophotometer. Electron spin resonance (ESR) measurements were performed using the Bruker ER 200D spectrometer at room temperature. N<sub>2</sub>-TPD (Autosorb-iQ-C chemisorption analyzer, Quantachrome, USA) was also performed.

### **Quantification of ammonia**

When tested in 0.1M KOH solution, we used spectrophotometry method to detect the quantification of ammonia. Briefly, after 1h electrocatalysis, 2ml electrolyte was removed from cathode, and following 2mL of 1M NaOH solution containing 5% salicylic acid and 5% sodium citrate was added into the solution. Subsequently, 1 mL of 0.05M NaClO and 0.2 mL of 1% C<sub>3</sub>FeN<sub>6</sub>Na<sub>2</sub>O·2H<sub>2</sub>O were added into the above solution. Then the solution was incubated under dark conditions at for 2h before UV-vis

absorption spectrum was measured at a wavelength of 655 nm (Shimadzu, UV-2550).  $\text{NH}_4^+$  calibration curve was calculated by using a series of different concentrations standard  $\text{NH}_3$  Solution (0  $\mu\text{g}/\text{mL}$ , 0.25  $\mu\text{g}/\text{mL}$ , 0.5  $\mu\text{g}/\text{mL}$ , 0.75  $\mu\text{g}/\text{mL}$ , 1  $\mu\text{g}/\text{mL}$ ).  $\text{NH}_4\text{Cl}$  was dried in oven before used. Calibration curve showed good linear relationship ( $y=0.3148x+0.0352$   $R^2=0.998$ ).

### **Quantification of hydrazine**

The quantification of hydrazine was detected by the method of Watt and Chrisp. In detail, 5.99g  $\text{C}_9\text{H}_{11}\text{NO}$ , 30 mL HCl, and 300 mL ethanol were mixed and used as the color reagent. After NRR process, 5ml electrolyte was taken from cathode, 5ml color reagent was then added into the electrolyte, the solution was incubated under dark conditions at 25 °C for 20min. Then the solution was measured at 455nm. As for  $\text{N}_2\text{H}_4$  standard solution, the absorbance at the wavelength of 455 nm was plotted against  $\text{N}_2\text{H}_4$  concentration gradient (0  $\mu\text{g}$ , 0.5  $\mu\text{g}$ , 1  $\mu\text{g}$ , 1.5  $\mu\text{g}$ , 2  $\mu\text{g}$ ) The calibration curve showed good linear relationship ( $y=1.153x+0.048$   $R^2=0.999$ ).

### **Quantification of nitrate**

Firstly, 1.0 mL electrolyte was taken out from the electrolytic cell and diluted to 5 mL to detection range. Then, 0.1 mL 1 M HCl were added into the solution. After shaking and standing for 15 minutes, the absorbance was detected by UV-Vis spectrophotometry at a wavelength of 220 nm and 275 nm. The final absorbance of nitrate-N was calculated based on the following equation:  $A=A_{220\text{nm}} - 2A_{275\text{nm}}$ . The calibration curve can be obtained through different concentrations of  $\text{KNO}_3$  solutions

and the corresponding absorbance. It showed an excellent linear relationship between the absorbance value and the  $\text{KNO}_3$  concentration from the fitting curve ( $y = 0.0631x + 0.021$ ,  $R^2 = 0.998$ ).

### **Quantification of nitrite**

The color developer was configured as follows: 20 g of p-aminobenzenesulfonamide was added to a mixed solution of 250 ml of water and 50 ml of phosphoric acid, and then 1 g of N-(1-naphthyl)-ethylenediamine dihydrochloride was dissolved in the above solution. Finally, the above solution was transferred to a 500 mL volumetric flask and diluted to the mark. 1.0 mL electrolyte was taken out from the electrolytic cell and diluted to 5 mL to detection range. Next, 0.1 mL color reagent was added into the aforementioned 5 mL solution. After shaking and standing for 20 minutes, the absorbance was tested by UV-Vis spectrophotometry at a wavelength of 540 nm. The calibration curve can be obtained through different concentrations of  $\text{NaNO}_2$  solutions and the corresponding absorbance. It showed an excellent linear relationship between the absorbance value and the  $\text{NaNO}_2$  concentration from the fitting curve ( $y = 0.785x + 0.031$   $R^2 = 0.9998$ ).

### **Calculation of the Faradaic efficiency and yield.**

The Faradaic efficiency of NRR was calculated as follows

$$FE = 3F \times c \times V / (17 \times Q)$$

where F is the Faraday constant, c is the measured  $\text{NH}_3$  concentration, V is the volume

of the electrolyte, and  $Q$  is the quantity of electric charge for one electron of NRR testing.

The  $\text{NH}_3$  formation rate was determined using the following equation:

$$r(\text{NH}_3) = (c \times V)/(t \times m)$$

where  $c$  is the measured  $\text{NH}_3$  concentration,  $V$  is the volume of the electrolyte,  $t$  is the reduction reaction time, and  $m$  is the loading mass of sample (loading mass: 0.25mg).

### **$^{15}\text{N}_2$ isotope labelling experiments**

$^{15}\text{N}$  isotopic labeling experiment was conducted using  $^{15}\text{N}_2$  as the feeding gas (99%, supplied by Shanghai Shoucheng Biotechnology Co.Ltd.) with identical experimental procedure as that of  $^{14}\text{N}_2$  experiment. The yielded  $^{15}\text{NH}_3$  was detected using  $^1\text{H}$ -NMR (Bruker Avance-600 MHz). The reference  $^{15}\text{NH}_4\text{Cl}$  sample was dissolved in 0.1 M KOH solution for the measurement, and 10ml electrolyte obtained from  $^{15}\text{N}_2$ -saturated 0.1 M KOH solution with a reaction time of 1 h and a concentration time of 12 h at  $80^\circ\text{C}$  to concentrate electrolyte to 1ml. At last, 0.5ml Dimethyl sulfoxide- $d_6$  ( $\text{DMSO-}d_6$ ) was added into 1ml concentrated KOH, and 1-3 drops of 0.5M  $\text{H}_2\text{SO}_4$  was added to adjust pH to 1-2 for the  $^1\text{H}$ -NMR measurement.

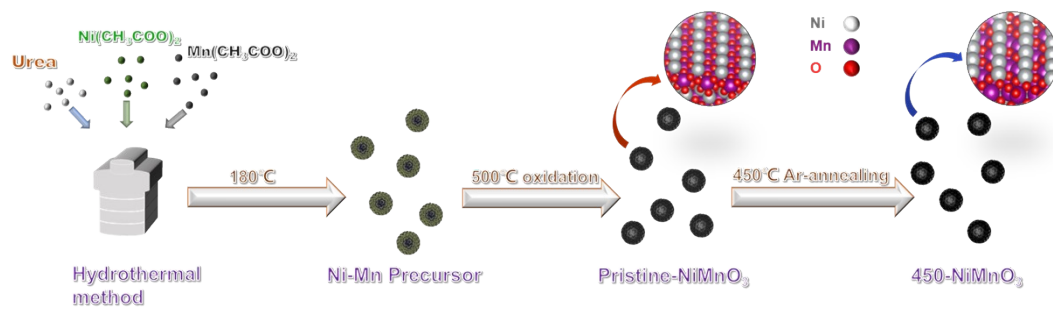

**Fig. S1 Schematic illustration of the synthesis process of 450-NiMnO<sub>3</sub>.**

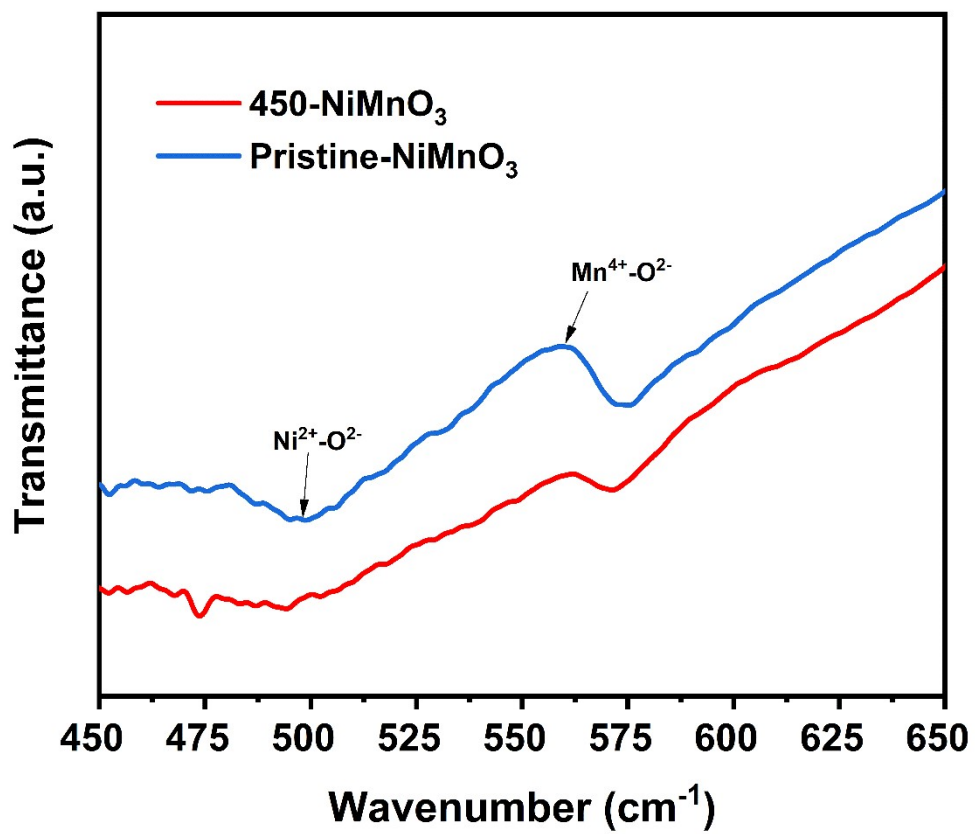

Fig. S2 FT-IR spectra of pristine-NiMnO<sub>3</sub> and 450- NiMnO<sub>3</sub>

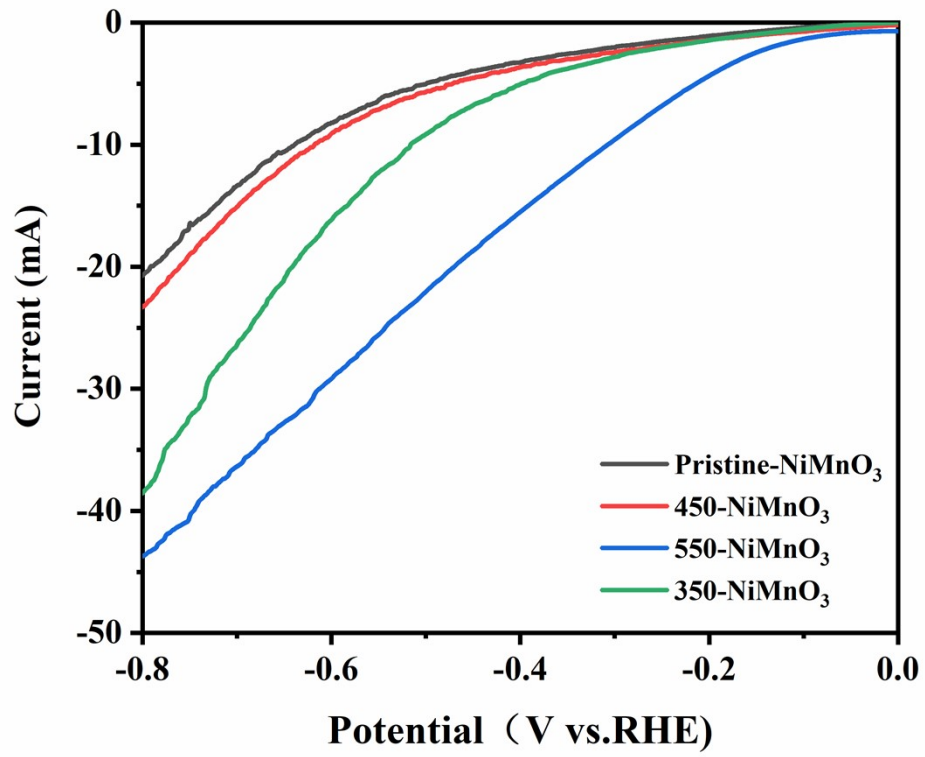

Fig. S3 LSV curves of Pristine-NiMnO<sub>3</sub>, 350-NiMnO<sub>3</sub>, 450-NiMnO<sub>3</sub> and 550-NiMnO<sub>3</sub>



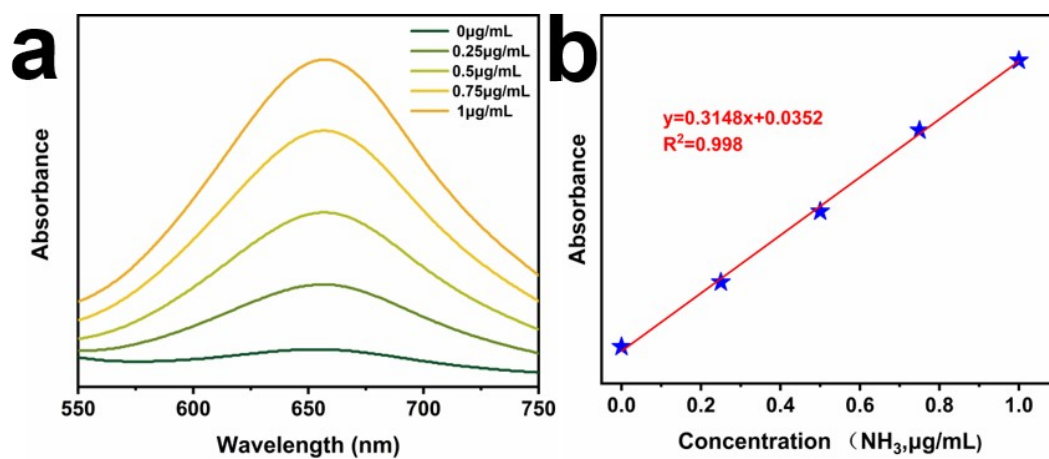

**Fig. S4 (a) UV-Vis spectra of various  $\text{NH}_3$  concentrations (mother solution: 0.1M KOH) after incubated for 1 h at room temperature. (b) Calibration curve used for calculation of  $\text{NH}_3$  concentrations.**

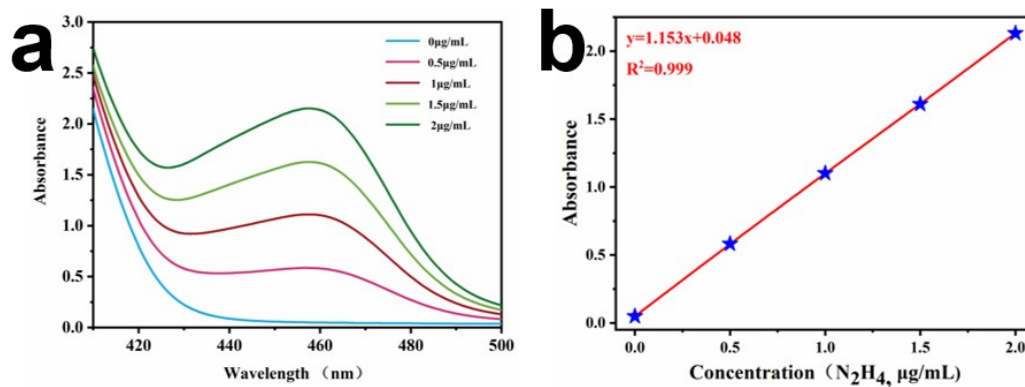

**Fig. S5. (a) UV-Vis spectra of various  $N_2H_4$  concentrations (mother solution: 0.1M KOH) after incubated for 20min at room temperature. (b) Calibration curve used for calculation of  $N_2H_4$  concentrations.**

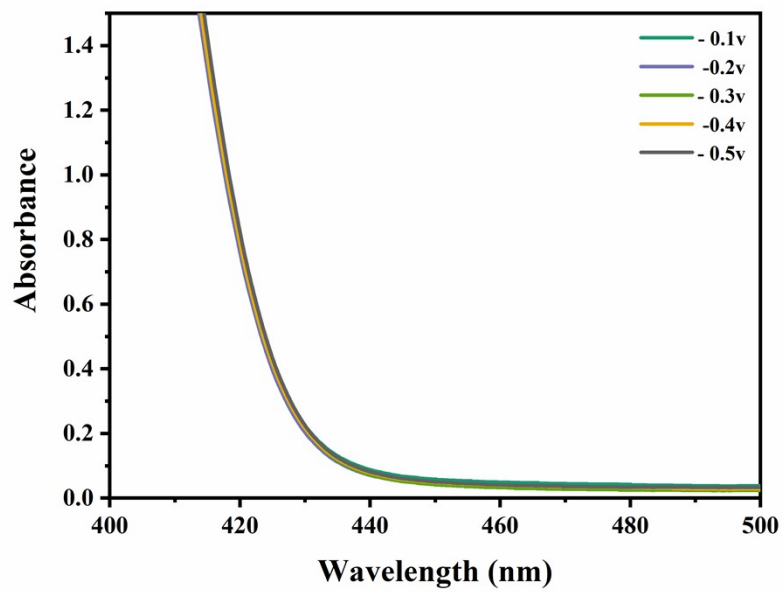

Fig. S6. UV-Vis spectra of the  $N_2H_4$

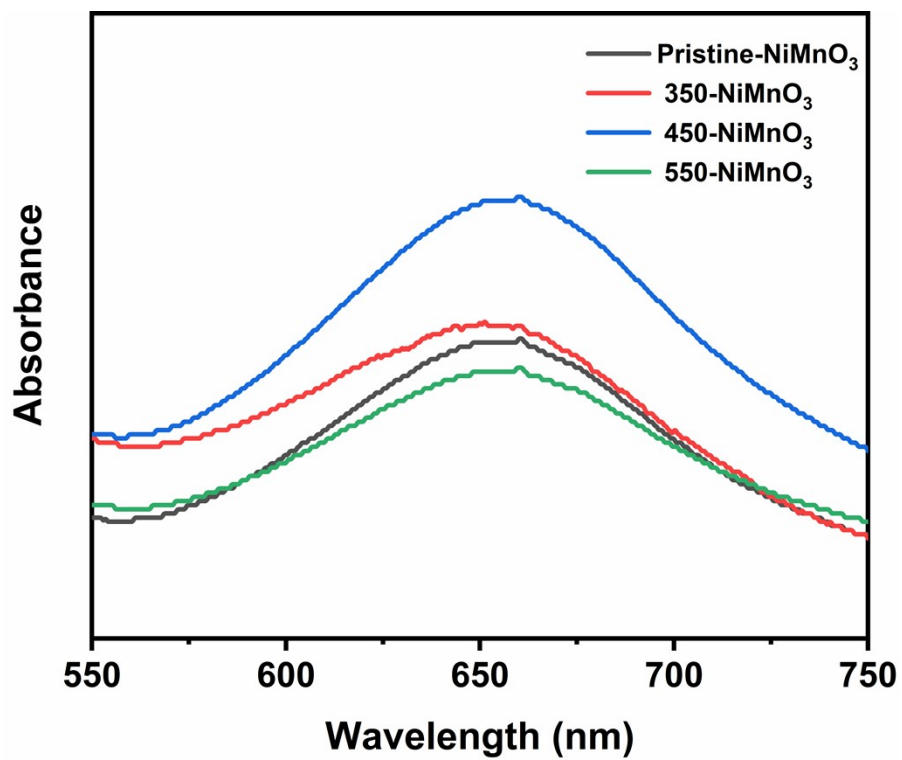

Fig. S7 UV-vis spectra of Pristine-NiMnO<sub>3</sub>, 350-NiMnO<sub>3</sub>, 450-NiMnO<sub>3</sub>, and 550-NiMnO<sub>3</sub>

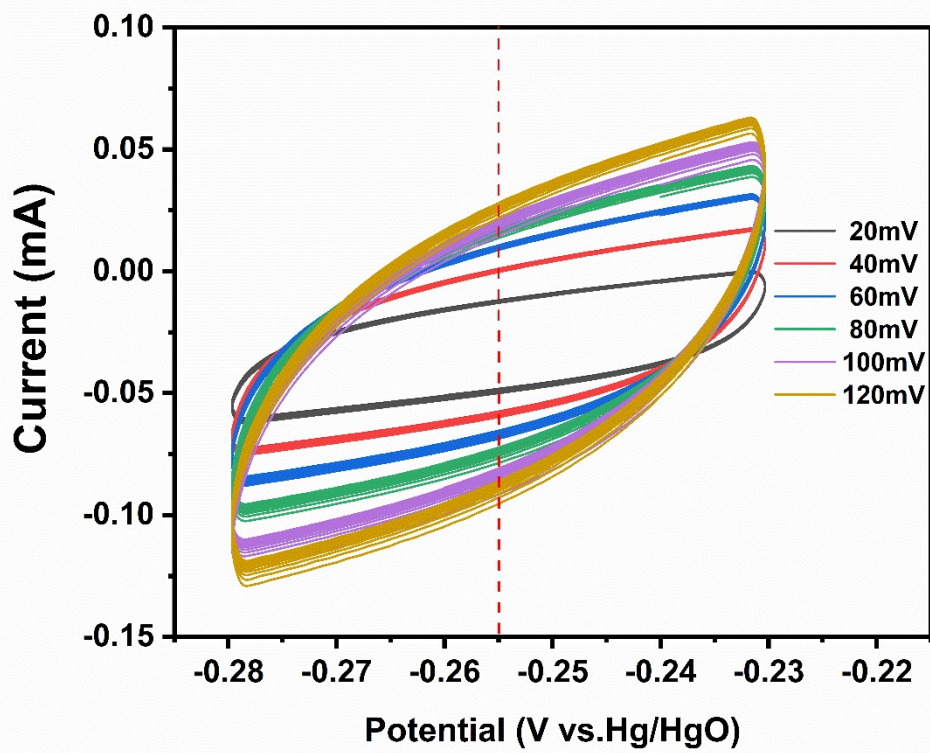

Fig. S8. CV curves of 450-NiMnO<sub>3</sub>

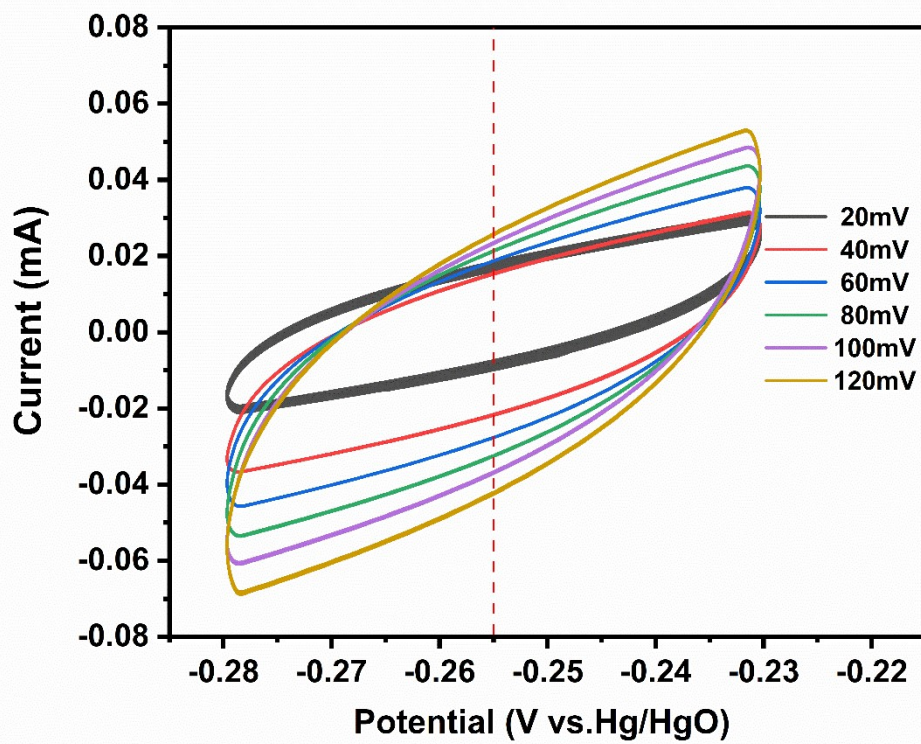

Fig. S9. CV curves of 350-NiMnO<sub>3</sub>

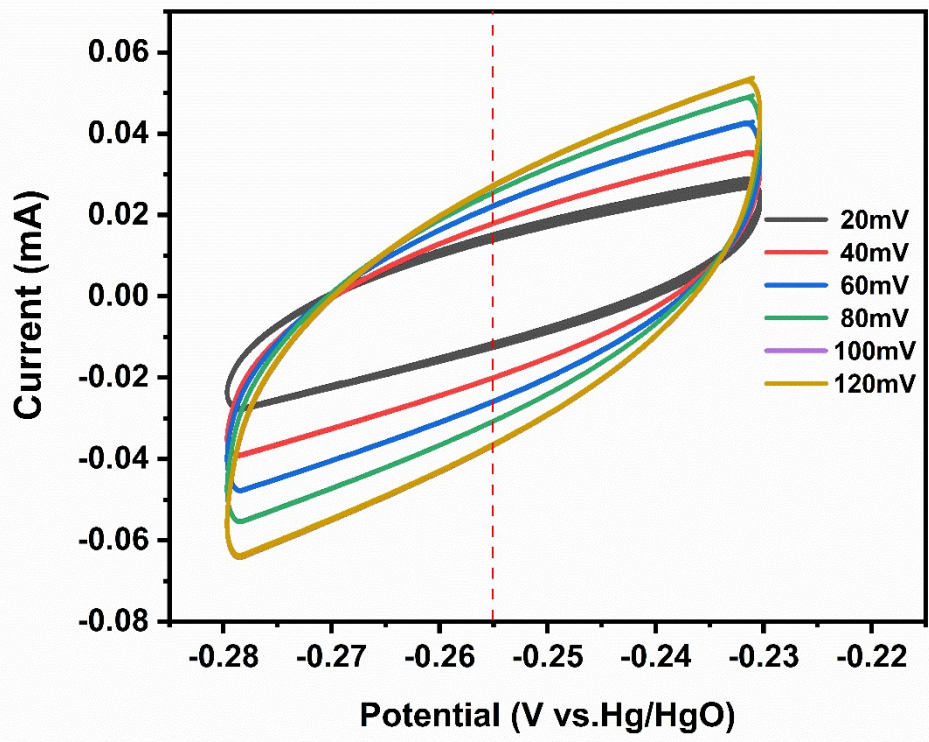

Fig. S10. CV curves of Pristine-NiMnO<sub>3</sub>

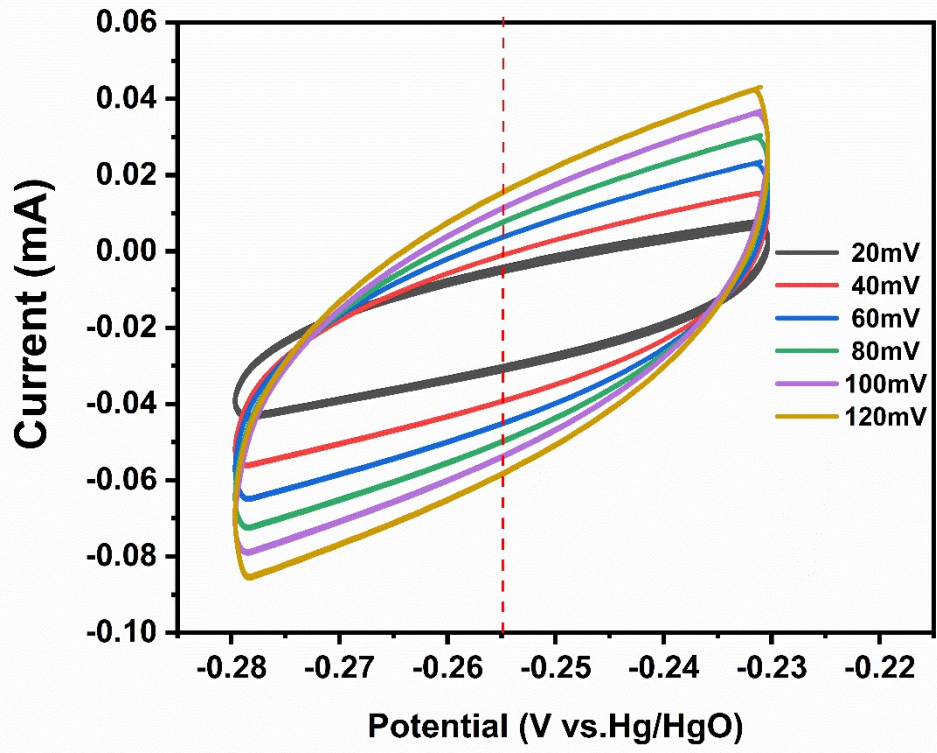

Fig. S11. CV curves of 550-NiMnO<sub>3</sub>



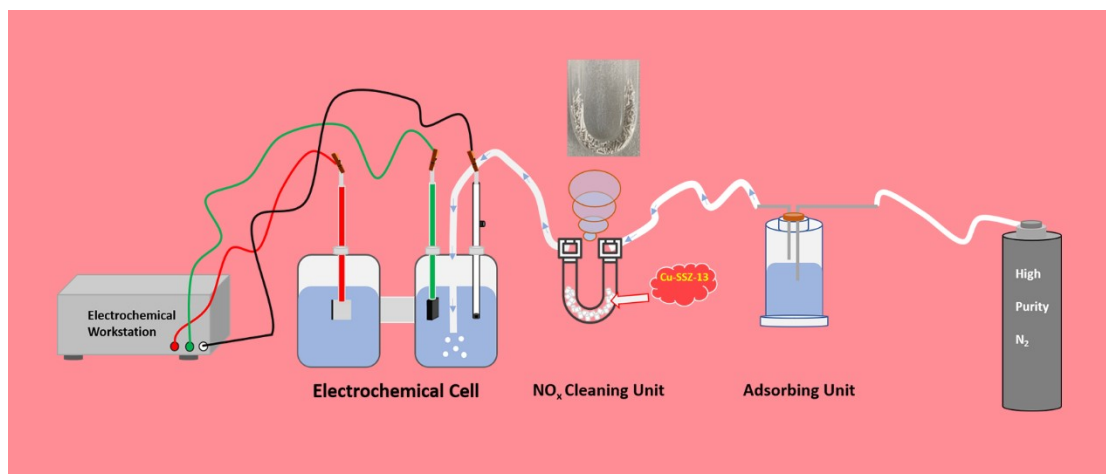

**Fig. S12. Schematic diagram of test setup**

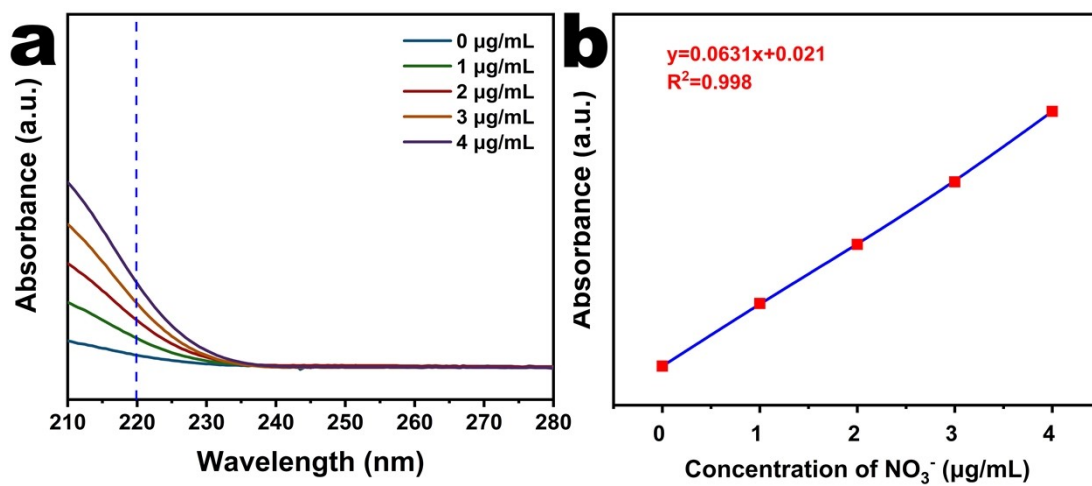

Fig. S13 (a) UV-Vis spectra of various nitrate concentrations. (b) Calibration curve used for calculation of nitrate concentrations.

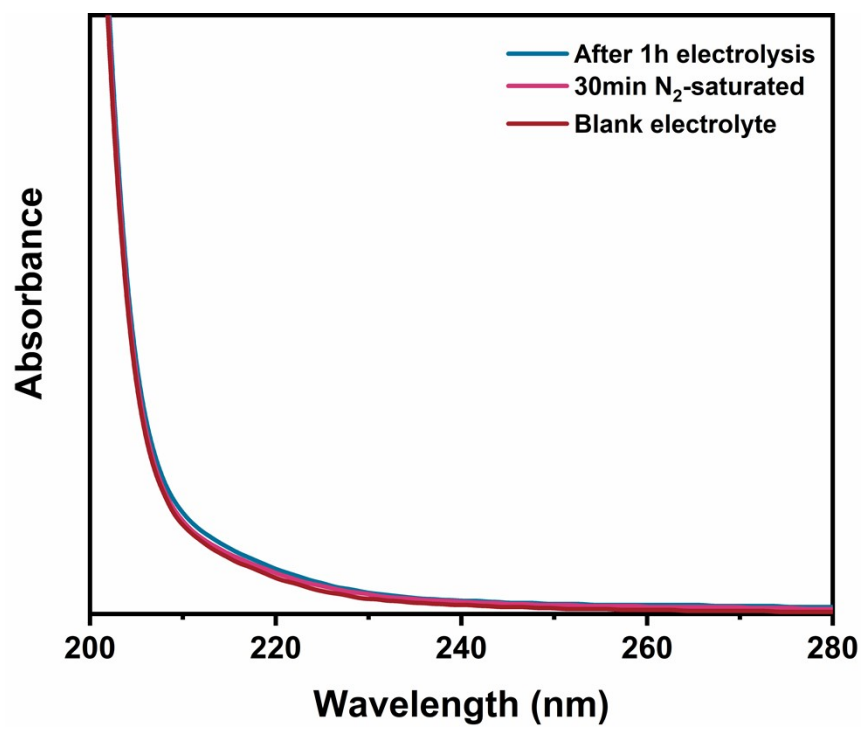

Fig. S14 UV-Vis spectra of nitrate of select stages

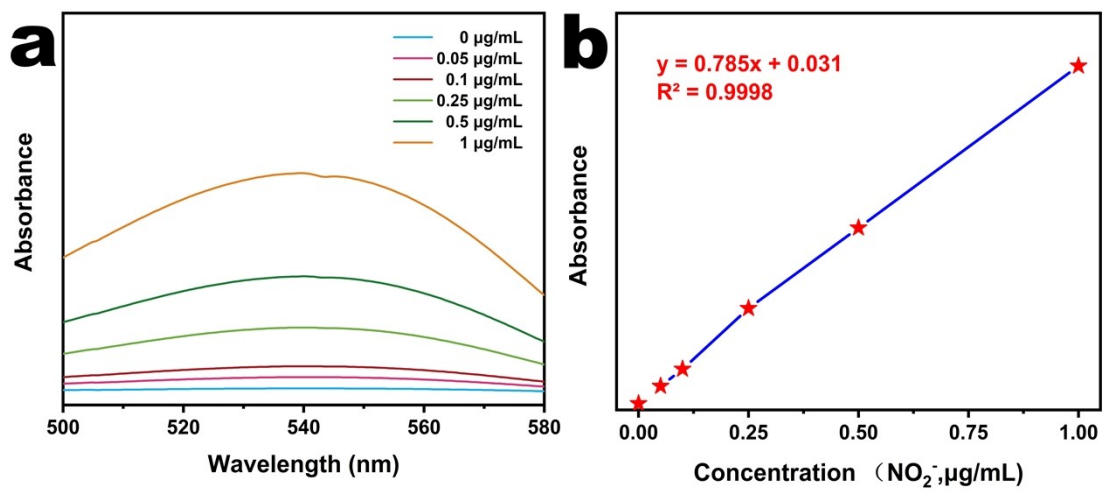

Fig. S15 (a) UV-Vis spectra of various nitrite concentrations. (b) Calibration curve used for calculation of nitrite concentrations

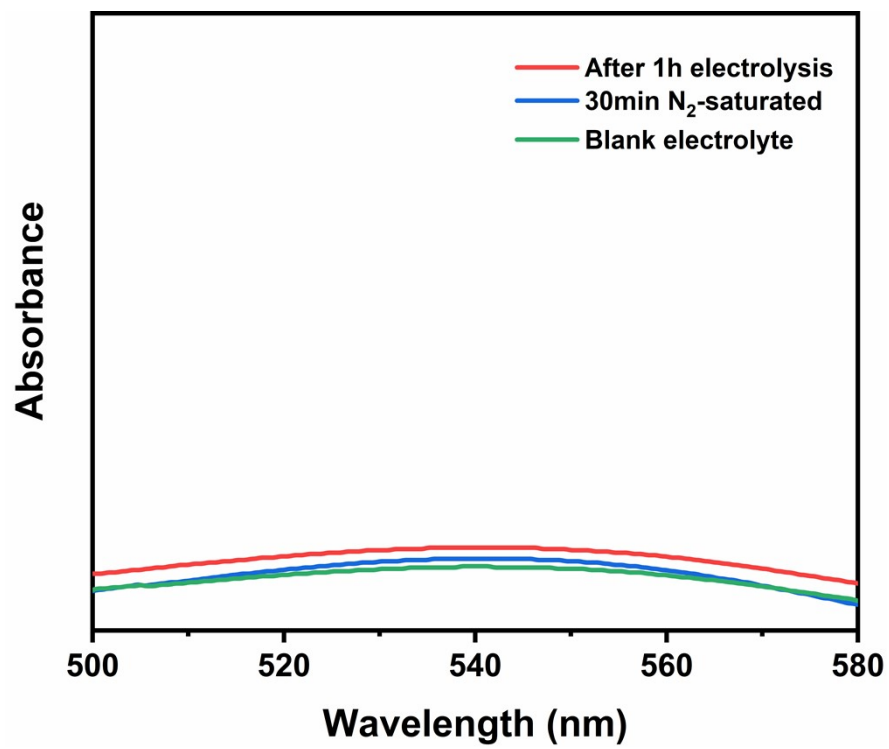

Fig. S16 UV-Vis spectra of nitrite of select stages

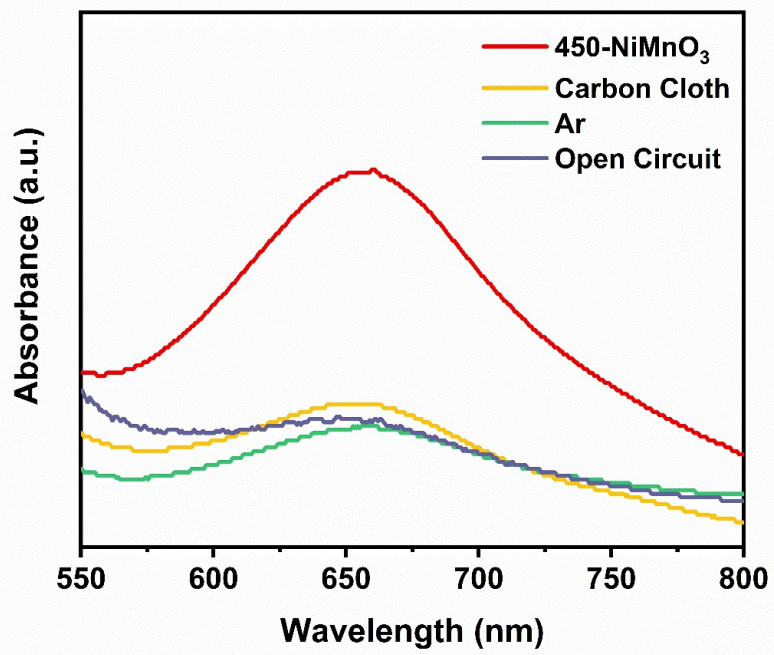

Fig. S17. UV-vis spectra of blank control

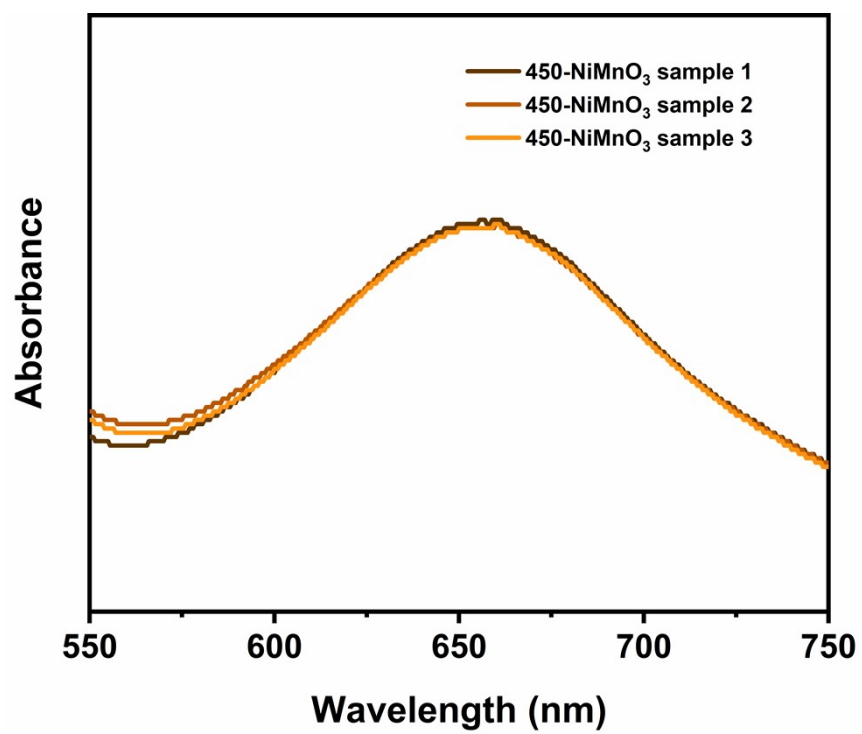

Fig. S18. UV-vis spectra of three independent samples

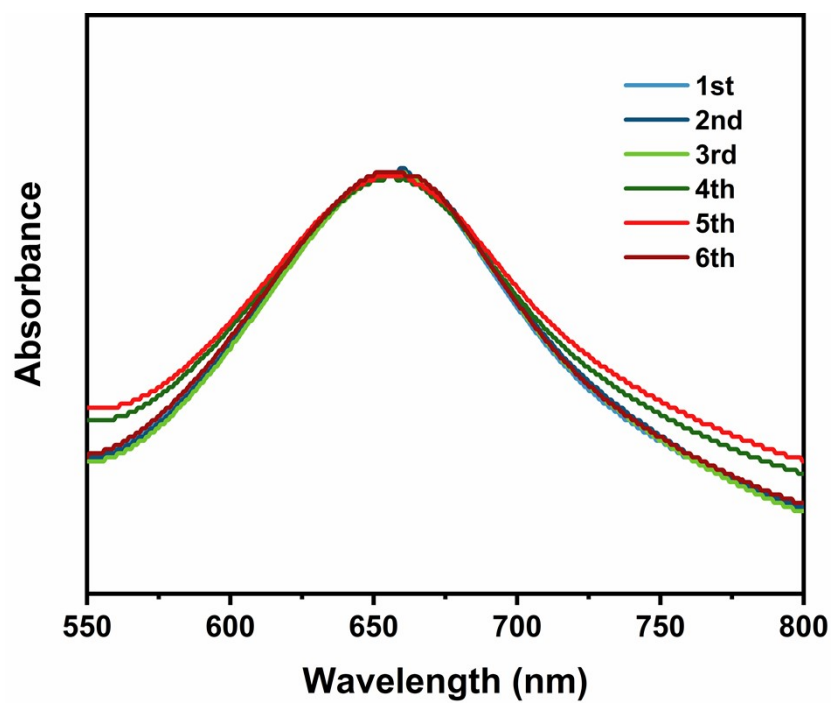

Fig. S19. UV-vis spectra of six-time cycle test



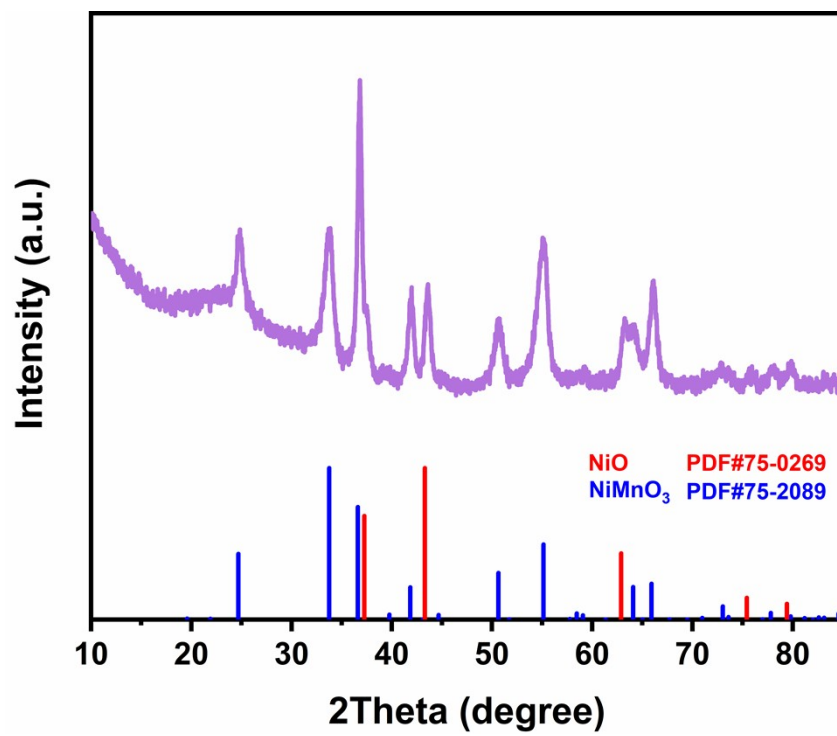

Fig. S20. XRD of 450-NiMnO<sub>3</sub> after cycle test

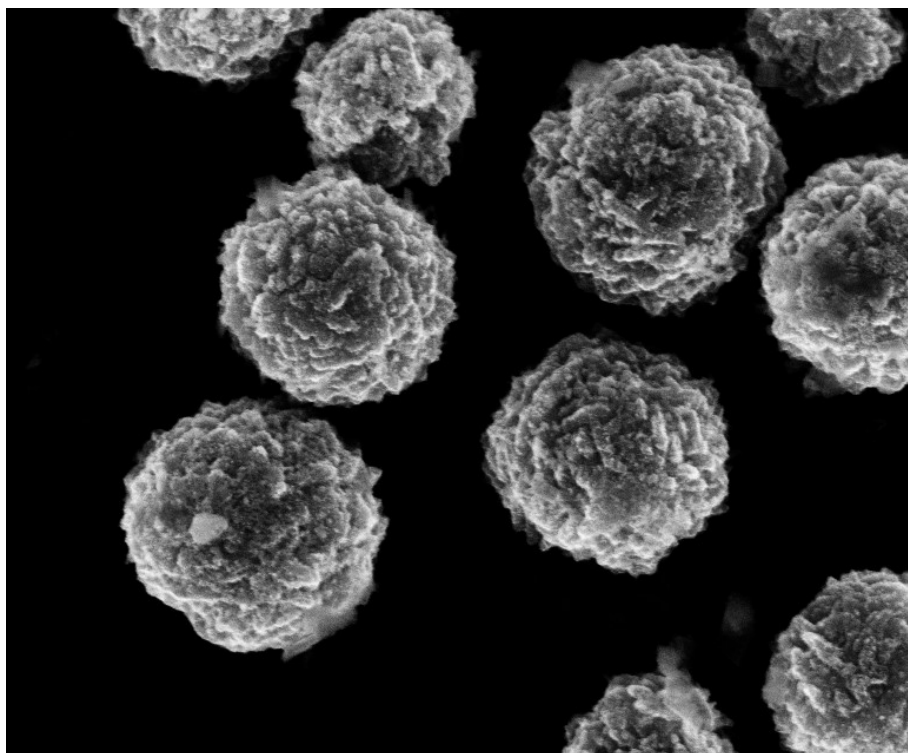

**Fig. S21. SEM image of 450-NiMnO<sub>3</sub> after cycle test**

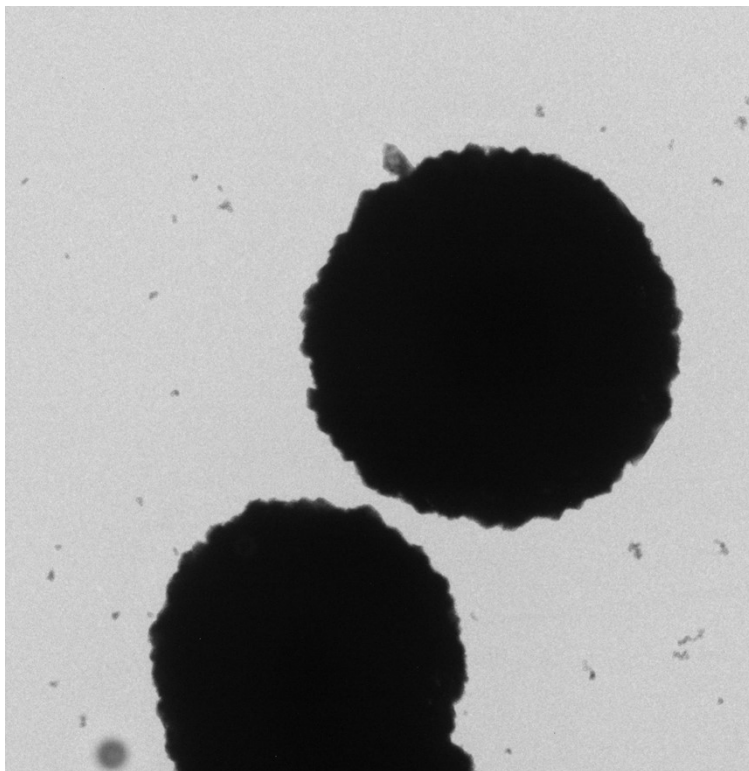

**Fig. S22. TEM image of 450-NiMnO<sub>3</sub> after cycle test**

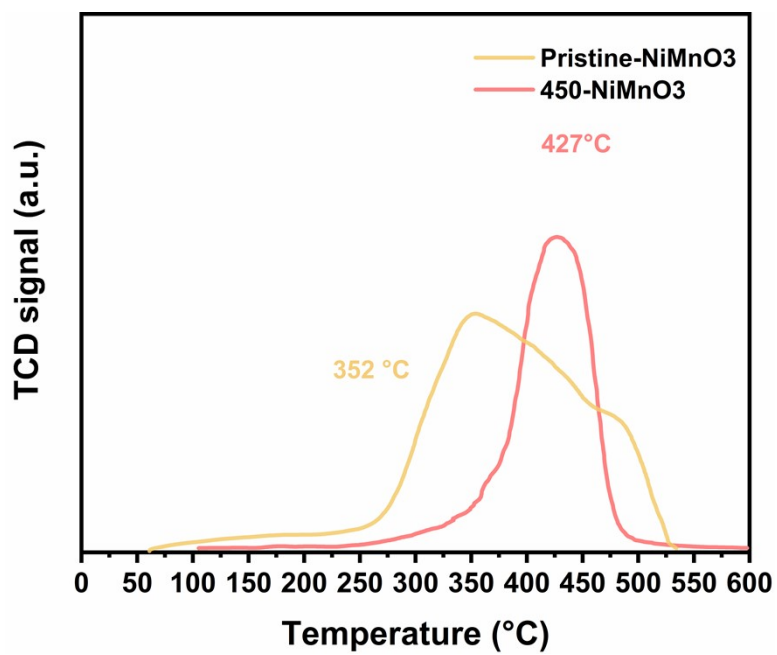

Fig. S23. N<sub>2</sub>-TPD measurements of 450-NiMnO<sub>3</sub> and pristine NiMnO<sub>3</sub>

**Table S1. The gas analysis of  $^{14}\text{N}_2$** 

| Items                                             | Results         |
|---------------------------------------------------|-----------------|
| $\text{N}_2$ gas purity                           | $\geq 99.999$   |
| Oxygen content                                    | $\leq 0.2$ ppm  |
| CO,CO <sub>2</sub> ,CH <sub>4</sub> total content | $\leq 0.7$ ppm  |
| H <sub>2</sub> O content                          | $\leq 0.2$ ppm  |
| N <sub>2</sub> O content                          | $\leq 0.15$ ppm |

**Table S2. The gas analysis of  $^{15}\text{N}_2$** 

| Items                        | Results        |
|------------------------------|----------------|
| $^{15}\text{N}_2$ gas purity | $\geq 99$      |
| Ar/O <sub>2</sub> content    | $\leq 300$ ppm |
| CO <sub>2</sub>              | $\leq 100$ ppm |
| $^{15}\text{N}_2\text{O}$    | $\leq 50$ ppm  |

**Table S3. Comparison with various electrocatalysts for ENRR.**

| <b>Catalyst</b>                                                 | <b>NH<sub>3</sub> yield</b>                                | <b>FE(%)</b>  | <b>Detection method</b> | <b>Electrolyte</b>                       | <b>Ref.</b>      |
|-----------------------------------------------------------------|------------------------------------------------------------|---------------|-------------------------|------------------------------------------|------------------|
| <b>450-NiMnO<sub>3</sub></b>                                    | <b>31.44μg/h/mg</b><br><b>(9.825μg/h / cm<sup>2</sup>)</b> | <b>14.5%</b>  | <b>Indophenol blue</b>  | <b>0.1M KOH</b>                          | <b>This work</b> |
| <b>OV-MnO<sub>2</sub></b>                                       | <b>9.79μg/h/cm<sup>2</sup></b>                             | <b>11.4%</b>  | <b>Indophenol blue</b>  | <b>0.1M KOH</b>                          | <b>1</b>         |
| <b>MnO<sub>2</sub>-Ti<sub>3</sub>C<sub>2</sub>T<sub>x</sub></b> | <b>34.1μg/h/mg</b>                                         | <b>11.39%</b> | <b>Indophenol blue</b>  | <b>0.1M KOH</b>                          | <b>2</b>         |
| <b>MnO-CNF</b>                                                  | <b>35.9μg/h/mg</b>                                         | <b>1.52%</b>  | <b>Indophenol blue</b>  | <b>0.1M Na<sub>2</sub>SO<sub>4</sub></b> | <b>3</b>         |
| <b>Mn<sub>3</sub>O<sub>4</sub> nanocubes</b>                    | <b>11.6μg/h/mg</b>                                         | <b>3%</b>     | <b>Indophenol blue</b>  | <b>0.1M Na<sub>2</sub>SO<sub>4</sub></b> | <b>4</b>         |
| <b>OV-TiO<sub>2</sub></b>                                       | <b>3μg/h/mg</b>                                            | <b>6.5%</b>   | <b>Indophenol blue</b>  | <b>0.1M KOH</b>                          | <b>5</b>         |
| <b>N-NiO/CC</b>                                                 | <b>22.7μg/h/mg</b>                                         | <b>7.3%</b>   | <b>Indophenol blue</b>  | <b>0.1M LiClO<sub>4</sub></b>            | <b>6</b>         |
| <b>NiO</b>                                                      | <b>29.1μg/h/mg</b>                                         | <b>10.8%</b>  | <b>Indophenol blue</b>  | <b>0.1M Na<sub>2</sub>SO<sub>4</sub></b> | <b>7</b>         |
| <b>Perovskite LaCrO<sub>3</sub></b>                             | <b>24.8μg/h/mg</b>                                         | <b>15%</b>    | <b>Indophenol blue</b>  | <b>0.1M KOH</b>                          | <b>8</b>         |
| <b>FeMoO<sub>4</sub></b>                                        | <b>17.51μg/h/mg</b>                                        | <b>10.53%</b> | <b>Indophenol blue</b>  | <b>0.1M Na<sub>2</sub>SO<sub>4</sub></b> | <b>9</b>         |

|                                                  |                              |        |                    |                               |    |
|--------------------------------------------------|------------------------------|--------|--------------------|-------------------------------|----|
| Perovskite<br>$\text{La}_2\text{Ti}_2\text{O}_7$ | 25.15 $\mu\text{g}/$<br>h/mg | 4.55%  | Indophenol<br>blue | 0.1 M HCl                     | 10 |
| Au/ $\text{WO}_{3-x}$                            | 23.15 $\mu\text{g}/$<br>h/mg | 14.72% | Indophenol<br>blue | 0.1 M HCl                     | 11 |
| $\text{CoFe}_2\text{O}_4$                        | 2.57 $\mu\text{g}/$<br>h/mg  | 6.2%   | Indophenol<br>blue | 0.1M $\text{Na}_2\text{SO}_4$ | 12 |

## References

- Zhang, L.; Xie, X. Y.; Wang, H.; Ji, L.; Zhang, Y.; Chen, H.; Li, T.; Luo, Y.; Cui, G.; Sun, X., Boosting electrocatalytic  $\text{N}_2$  reduction by  $\text{MnO}_2$  with oxygen vacancies. *Chem Commun (Camb)* **2019**, 55 (32), 4627-4630.
- Kong, W.; Gong, F.; Zhou, Q.; Yu, G.; Ji, L.; Sun, X.; Asiri, A. M.; Wang, T.; Luo, Y.; Xu, Y., An  $\text{MnO}_2\text{-Ti}_3\text{C}_2\text{Tx}$  MXene nanohybrid: an efficient and durable electrocatalyst toward artificial  $\text{N}_2$  fixation to  $\text{NH}_3$  under ambient conditions. *Journal of Materials Chemistry A* **2019**, 7 (32), 18823-18827.
- Zheng, X.; Zhang, Z.; Li, X.; Ding, C.,  $\text{MnO}$ -carbon nanofiber composite material toward electro-chemical  $\text{N}_2$  fixation under ambient conditions. *New Journal of Chemistry* **2019**, 43 (21), 7932-7935.
- Wu, X.; Xia, L.; Wang, Y.; Lu, W.; Liu, Q.; Shi, X.; Sun, X.,  $\text{Mn}_3\text{O}_4$  Nanocube: An Efficient Electrocatalyst Toward Artificial  $\text{N}_2$  Fixation to  $\text{NH}_3$ . *Small* **2018**, 14 (48), e1803111.
- Han, Z.; Choi, C.; Hong, S.; Wu, T.-S.; Soo, Y.-L.; Jung, Y.; Qiu, J.; Sun, Z., Activated  $\text{TiO}_2$  with tuned vacancy for efficient electrochemical nitrogen reduction. *Applied Catalysis B: Environmental* **2019**, 257.
- Wang, X. h.; Wang, J.; Li, Y. b.; Chu, K., Nitrogen-Doped NiO Nanosheet Array for

Boosted Electrocatalytic N<sub>2</sub> Reduction. *ChemCatChem* **2019**, 11 (18), 4529-4536.

7. Li, Y.-b.; Liu, Y.-p.; Wang, J.; Guo, Y.-l.; Chu, K., Plasma-engineered NiO nanosheets with enriched oxygen vacancies for enhanced electrocatalytic nitrogen fixation. *Inorganic Chemistry Frontiers* **2020**, 7 (2), 455-463.

8. Ohrelius, M.; Guo, H.; Xian, H.; Yu, G.; Alshehri, A. A.; Alzahrani, K. A.; Li, T.; Andersson, M., Electrochemical Synthesis of Ammonia Based on a Perovskite LaCrO<sub>3</sub> Catalyst. *ChemCatChem* **2019**, 12 (3), 731-735.

9. Wu, J.; Wang, Z.; Li, S.; Niu, S.; Zhang, Y.; Hu, J.; Zhao, J.; Xu, P., FeMoO<sub>4</sub> nanorods for efficient ambient electrochemical nitrogen reduction. *Chem Commun (Camb)* **2020**, 56 (50), 6834-6837.

10. Yu, J.; Li, C.; Li, B.; Zhu, X.; Zhang, R.; Ji, L.; Tang, D.; Asiri, A. M.; Sun, X.; Li, Q.; Liu, S.; Luo, Y., A perovskite La<sub>2</sub>Ti<sub>2</sub>O<sub>7</sub> nanosheet as an efficient electrocatalyst for artificial N<sub>2</sub> fixation to NH<sub>3</sub> in acidic media. *Chem Commun (Camb)* **2019**, 55 (45), 6401-6404.

11. Li, Y.; Yan, P.; Chen, J.; Ren, Y.; Zhou, Y.; Ge, T.; Chen, J.; Xu, Q., High-efficiency electrocatalyst for N<sub>2</sub> conversion to NH<sub>3</sub> based on Au nanoparticles loaded on defective WO<sub>3-x</sub>. *Chem Commun (Camb)* **2019**, 55 (88), 13307-13310.

12. Ahmed, M. I.; Chen, S.; Ren, W.; Chen, X.; Zhao, C., Synergistic bimetallic CoFe<sub>2</sub>O<sub>4</sub> clusters supported on graphene for ambient electrocatalytic reduction of nitrogen to ammonia. *Chem Commun (Camb)* **2019**, 55 (81), 12184-12187.
